# Supplementary material for: A 258-year-long data set of temperature and precipitation fields for Switzerland since 1763
Source: Copernicus journal article supplement (doi:10.5194/cp-19-703-2023), 2023-03-29
Supplement: Supplementary file 1 [file cp-19-703-2023-supplement.zip]

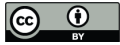

## *Supplement of*

# **A 258-year-long data set of temperature and precipitation fields for Switzerland since 1763**

**Noemi Imfeld et al.**

*Correspondence to:* Noemi Imfeld (noemi.imfeld@giub.unibe.ch)

- cp-19-703-2023-supplement-title-page.pdf
- code
  - code\_datapreparation
    - \* C000\_dataprep\_swiss\_arm.R
    - \* C000\_helpfun.R
    - \* C001\_calc\_dailymeans\_arm.R
    - \* C001\_calc\_dailymeans\_rrt.R
    - \* C002\_pressure\_reduction\_20crv2.R
    - \* C003\_daily\_qc.R
    - \* C003\_rr0\_qc.R
    - \* C003\_spatial\_consistency\_p.R
    - \* C003\_spatial\_consistency\_ta.R
    - \* C004\_create\_hom\_input.R
    - \* C005\_create\_referenceseries\_p.R
    - \* C005\_create\_referenceseries\_rr.R
    - \* C005\_create\_referenceseries\_rr0.R
    - \* C005\_create\_referenceseries\_ta.R
    - \* C005\_homogenization\_ref\_ta.R
    - \* C005\_karlsruhe\_ta\_sef.R
    - \* C005\_lugano\_hom\_input.R
    - \* C006\_create\_sef\_from\_longseries.R
    - \* C006\_merge\_basel\_p.R
    - \* C006\_merge\_bern\_p.R
    - \* C006\_merge\_genf\_p.R
    - \* C006\_merge\_zurich\_p.R
    - \* C007\_homogenization\_to\_reference.R
    - \* Cget\_ncdf.R
  - code\_reconstruction

- \* C000\_run\_recon.sh
- \* C010\_masterscript.R
- \* C011\_scenarios.R
- \* C012\_packages.R
- \* C013\_helpfun.R
- \* C020\_preprocessing.R
- \* C030\_analogs.R
- \* C040\_extract\_netcdf\_loop.sh
- \* C041\_extract\_netcdf\_precip\_yearwise.py
- \* C042\_extract\_netcdf\_temp\_yearwise.py
- \* C050\_EnKF\_loop.sh
- \* C051\_obs\_error.R
- \* C052\_EnKF\_help.R
- \* C053\_EnKF.R
- \* C060\_Qmap\_fit.R
- \* C071\_validation\_precip.py
- \* C072\_validation\_temp.py

The copyright of individual parts of the supplement might differ from the article licence.
